# Supplementary material
Source: HighWire-hosted journal article supplement (https://jnm.snmjournals.org/highwire/filestream/103405/field_highwire_adjunct_files/0/258871_Supplemental_Data.pdf)
Supplement: 258871_Supplemental_Data.pdf [file 258871_Supplemental_Data.pdf]

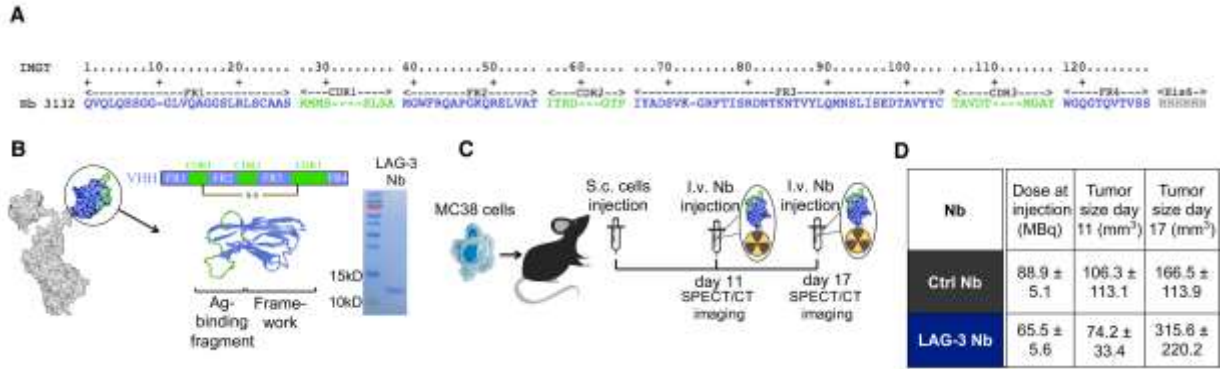

**Supplemental Figure 1:** Injection of <sup>99m</sup>Tc-labeled LAG-3 nanobody "3132" in MC38-bearing mice. (a) Amino acid sequence of the nanobody. (b) Structural model of a llama light-chain-deficient antibody from which the nanobody is derived and a Coomassie blue-stained protein gel loaded with 20µg of purified LAG-3 nanobody. (c) Timeline of the experiment. (d) Dose of injected radiolabeled LAG-3 nanobody (n = 18) or control nanobodies (n = 6) in MC38-bearing mice and the average tumor size at day of imaging.

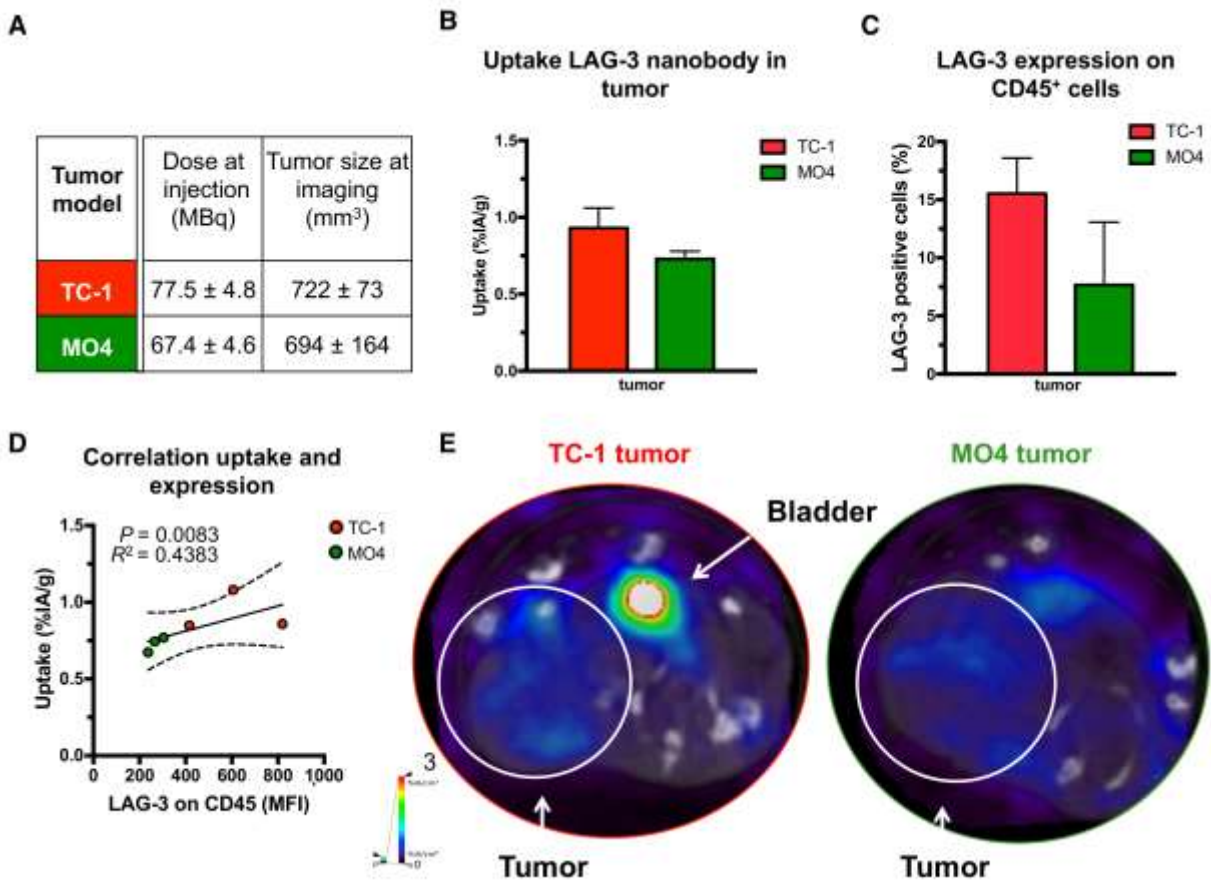

**Supplemental Figure 2:** SPECT/CT-imaging of LAG-3 using radiolabeled LAG-3 nanobody in TC-1 or MO4-bearing mice. **(a)** Dose of injected radiolabeled LAG-3 nanobody in mice bearing TC-1 (n=3) or MO4 (n=3) tumors and tumor volume at the time of imaging. **(b)** LAG-3 nanobody tracer tumor uptake levels as determined by *ex vivo*  $\gamma$ -counting of dissected tumors. **(c)** Percentage of LAG-3<sup>+</sup>/CD45<sup>+</sup> immune cells in tumors. **(d)** Correlation plot of LAG-3 expression (MFI) on immune cells (CD45<sup>+</sup>) in TC-1 or MO4 tumors as analyzed by flow cytometry (x-axis) and the *ex vivo*  $\gamma$ -counting of the tumors (%IA/g, y-axis). **(e)** Representative axial SPECT/CT-images of TC-1 or MO4-bearing mice i.v. injected with <sup>99m</sup>Tc-labeled LAG-3 nanobody.

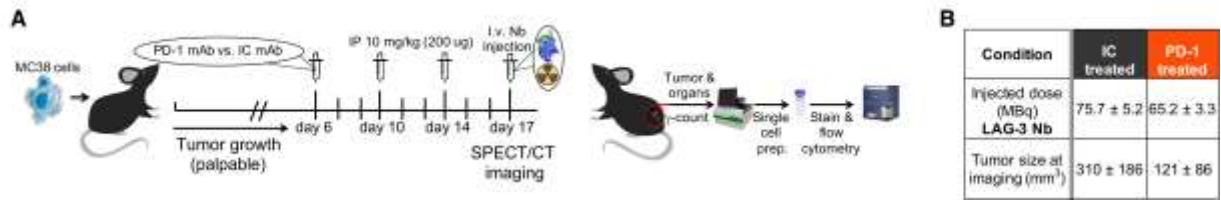

**Supplemental Figure 3:** Evaluating PD-1-blockade versus IC in MC38-bearing mice. **(a)** Timeline of the experiment. **(b)** Tumor size at time of imaging and dose of injected radiolabeled LAG-3 nanobody in MC38-bearing mice treated with either IC-mAbs (n=7) or PD-1-blocking mAbs (n=8).

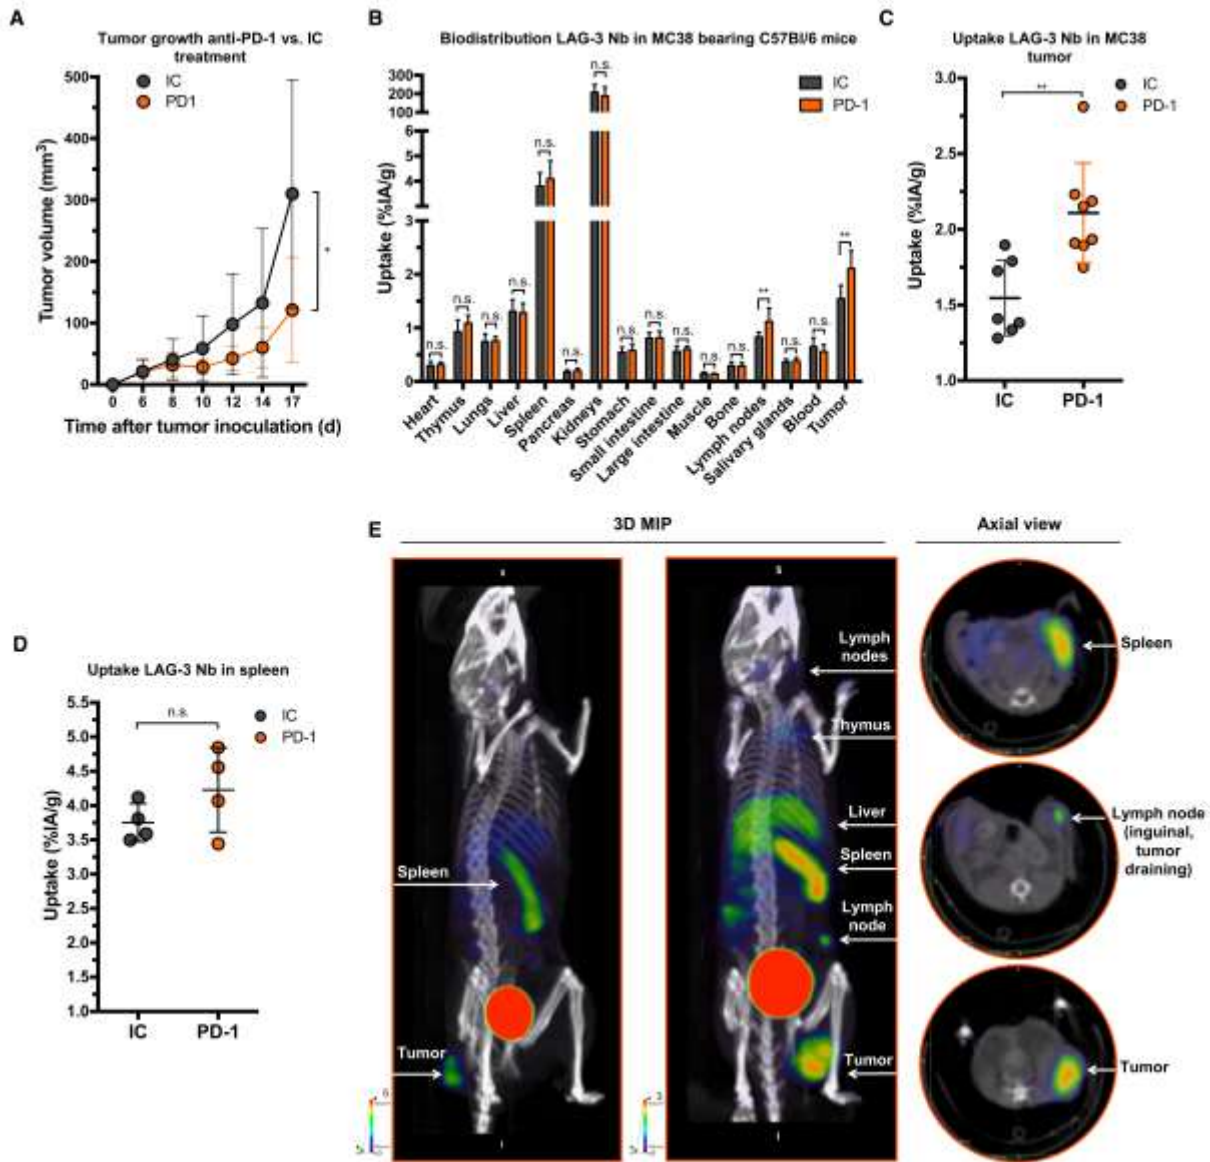

**Supplemental Figure 4:** Effect of PD-1-blockade versus IC in MC38-bearing mice on LAG-3 detection in the tumor and spleen. (a) Growth kinetics of MC38-tumors treated with IC-mAbs (n=7) or PD-1-blocking mAbs (n=8). (b) *Ex vivo*  $\gamma$ -counting of isolated organs from MC38-bearing mice, treated with anti-PD-1 or IC, 80 minutes after injection of LAG-3 nanobody tracer. (c) Uptake levels of LAG-3 nanobody tracer in MC38-tumors of anti-PD-1 or IC-treated mice, as determined by *ex vivo*  $\gamma$ -counting. (d) Uptake levels of LAG-3 nanobody tracer in spleens of anti-PD-1 or IC-treated mice, as determined by *ex vivo*  $\gamma$ -counting. (e) SPECT/CT-imaging of anti-PD-1 treated mice i.v. injected with LAG-3 nanobody tracer, scaled at 0-5 (left) or 0-3 %IA/cm<sup>3</sup> (right), showing specific signals in the spleen, tumor and tumor-draining lymph node (n=2). Note the removal of both kidneys before image acquisition.

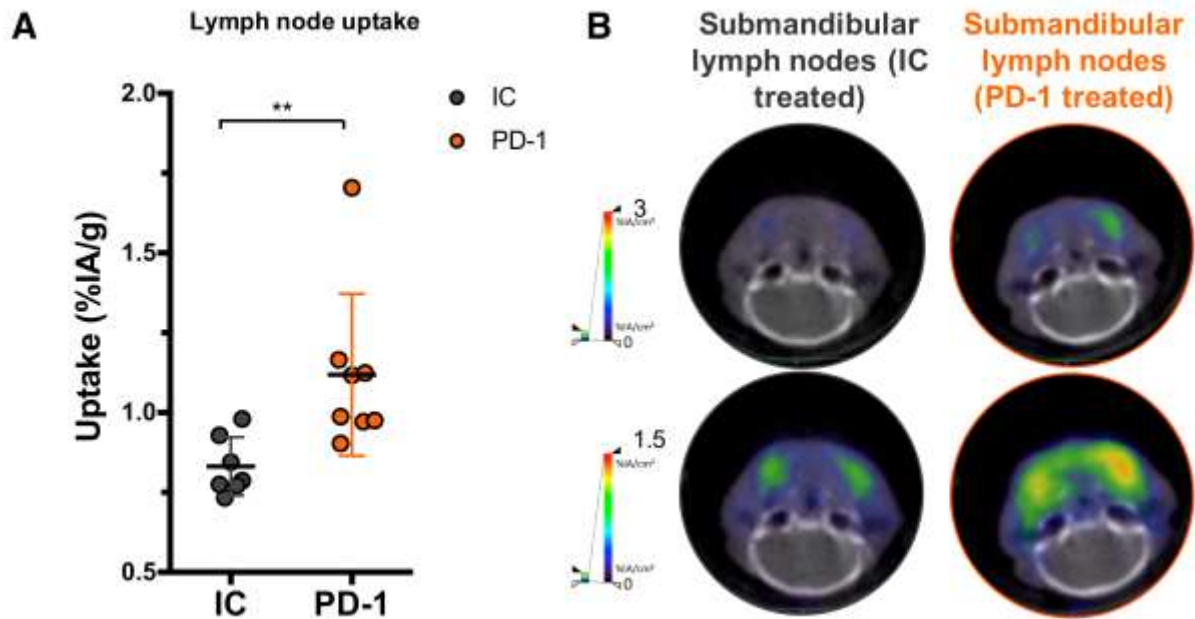

**Supplemental Figure 5:** Effect of PD-1-blockade versus IC in MC38-bearing mice on LAG-3 detection in the submandibular lymph nodes. **(a)** Uptake levels of LAG-3 nanobody tracer in submandibular lymph nodes of anti-PD-1 or IC-mAb treated mice, as determined by *ex vivo*  $\gamma$ -counting. **(b)** Representative axial SPECT/CT-images of submandibular lymph nodes of anti-PD-1 or IC-mAb treated mice i.v. injected with  $^{99m}\text{Tc}$ -labeled LAG-3, scaled at 0-3 %IA/cm<sup>3</sup> (above) and 0-1.5 %IA/cm<sup>3</sup> (below).
